# Supplementary material for: Early Chronic Memantine Treatment-Induced Transcriptomic Changes in Wild-Type and Shank2-Mutant Mice
Source: Front Mol Neurosci. 2021 Sep 14;14:712576. doi: 10.3389/fnmol.2021.712576 (PMC8477010; doi:10.3389/fnmol.2021.712576)
Supplement: Supplementary Table 8 — List ASD-related/risk and cell-type-specific gene sets used for GSEA. [file Table_8.XLSX]

## Sheet: ASD-related,risk
Supplementary Table 8. List ASD-related/risk and cell-type-specific gene sets used for GSEA.
DEG_UP_Voineagu	HIST1H2BD	GADD45G	DTNA	BAG3	MSN	SFMBT2	GYPC	SLC2A5	HSPB1	ZFP36L1	PTPRZ1	IER3	KLF15	PLOD1	PDK4	TNFRSF1A	RHBDF2	P4HA1	RPN2	PALLD	RALGDS	TGM2	ADM	TIMP1	METRN	NFKBIZ	NQO1	BST2	INPPL1	CXCL16	HIST2H2BE	BCAN	CACHD1	KCNN3	SDF2L1	RHPN2	PLXDC2	CLIC1	HIST1H1C	SLC9A9	ABCA1	DEPP1	CPNE3	GBP2	FBLN2	DNAJB1	LYN	CEBPD	CDKN1A
Co-Exp Up, M16 Voineagu	CACHD1	AK4	LEPROT	ICAM2	NFIA	GNA13	PITPNC1	FGF2	FAM111A	SERPINB6	TSEN34	RPL14	CD99	GRAMD2B	NEK6	MSI2	PLOD2	TUBB2B	ANOS1	PLSCR4	TBL1X	HSPB1	FAM129B	PNP	HSCB	ECI2	PTPN12	SLC15A3	CSRP2	TM4SF1	SERP1	TMEM216	ANXA5	VAMP8	VAMP5	TMEM150A	ITGAV	PPFIA1	ELF1	STOM	NECAP2	WLS	PHF11	PRCP	SOX9	BNIP2	CXCL16	CDC42EP4	IFITM2
DEG_DOWN_Voineagu	POPDC3	ASB13	GFRA2	ACTL6B	ATP1B1	ZNF365	SYT13	ATP6V1C1	SH3GL2	ESRRG	COX7A1	TNNT2	CADPS	KIF17	CPLX2	CHGA	F12	INA	CIRBP	GLS2	CABP1	STAMBPL1	CADPS2	RGS7	PIAS2	SCN4B	SLC25A27	FAM81A	NEFH	ATP6V1A	PRKCE	STAC2	ETS2	NEUROD6	SLC6A17	SLC29A1	GPX3	GAD2	STXBP1	SERTAD4	UCHL5	ATP1A1	CKMT1A	JADE1	VAMP1	ARMCX5	TESC	CHRM1	CACNA2D3
Co-Exp Down, M12 Voineagu	TCTEX1D1	CYB561	RAB11FIP5	ENO2	STRBP	MFSD3	STX3	CABLES2	RHBDD2	SSBP3	INPP4B	EEF1A2	DCTN1	DLK2	DLGAP2	WDR54	STAMBPL1	RALGPS1	SHROOM2	JADE1	STXBP1	CHSY3	FLRT3	NEFH	THOC5	PRPF19	SEMA4F	PDS5B	PAK1	PQLC1	SLC6A15	TPRG1L	ATP13A2	BBS7	CAMSAP3	ATP2B2	LZTFL1	CAP2	ABCA5	FAM81A	SLC29A1	PPP2R5D	ABCB9	PRRT3	CPNE4	HSPA12A	FBXW7	KLHDC3	GPR162
SFARI Genes [All]	ALDH1A3	ANK3	AP1S2	ARNT2	ATP1A3	ATRX	CADPS2	CAMK2A	CAMK2B	CAMSAP2	CDK13	CDKN1B	CELF4	CEP290	CHKB	CNOT3	CTCF	CTNNB1	CTTNBP2	CUX2	CXCR3	CYP27A1	DIAPH3	DISC1	ADNP	ADORA2A	ALDH5A1	ALG6	ARHGEF9	ARID1B	DLG4	DMPK	DUSP22	EEF1A2	AVPR1A	CNTN4	CNTN5	CNTN6	CSMD1	CYP11B1	DHX30	DIXDC1	DYRK1A	ADSL	AHI1	ARHGAP32	ASMT	ASTN2	BCKDK
SFARI Genes [High Confidence]	ABAT	ABCA10	ACE	ACHE	ADA	ADCY5	ADK	ADNP	ADORA2A	ADRB2	ADSL	AFF2	AGAP1	AGBL4	AGMO	AGTR2	AHDC1	AHI1	AKAP9	ALDH5A1	ALG6	AMPD1	AMT	ANK2	ANKRD11	ANXA1	APBA2	APH1A	AR	ARID1B	ARNT2	ARX	ASH1L	ASMT	ASTN2	ASXL3	ATP10A	ATP1A3	ATP2B2	ATRX	AUTS2	AVPR1A	BCKDK	BCL11A	BRAF	BRCA2	TSPOAP1	EMSY	TERB2
FMRP Targets	ALS2	PLXND1	ARHGAP33	CREBBP	TSPOAP1	MYCBP2	TMEM132A	CACNA1G	VPS41	ARHGAP44	GAS7	PIGQ	SYN1	CDKL5	SPAG9	CELSR3	NFIX	PKD1	RHOBTB2	HEATR5B	UBE3C	REV3L	UQCRC1	NISCH	IDS	FYN	HIVEP2	SYT7	LARS2	EXTL3	SRCIN1	ATP1A2	PHLDB1	NCDN	NRXN3	GRAMD1B	PHF20	ANK1	LRRC7	ATP6V0A1	TRIO	CLEC16A	RIPOR1	RTN4R	INPP4A	MYO16	PREX2	ARAP2	MAP4
De Novo Missense	CHD8	DYRK1A	ANK2	GRIN2B	DSCAM	CHD2	ARID1B	KDM6B	ADNP	MED13L	SCN2A	WDFY3	ANKRD11	DIP2A	NCKAP1	TNRC6B	PHF2	WAC	KDM5B	POGZ	TBR1	FOXP1	GIGYF1	KATNAL2	KMT2E	RIMS1	TCF7L2	ASH1L	DOT1L	SPEN	AKAP9	DIP2C	GPRIN1	MBD5	MED13	NBEA	UBAP2L	UBR5	MYH10	SYNGAP1	TRIP12	AHDC1	CIC	CTNNB1	DST	KIAA0100	KIF21A	NF1	SPAG9
De Novo Variants	CHD8	DYRK1A	ANK2	GRIN2B	DSCAM	CHD2	ARID1B	KDM6B	ADNP	MED13L	SCN2A	WDFY3	ANKRD11	DIP2A	NCKAP1	TNRC6B	PHF2	WAC	KDM5B	POGZ	TBR1	FOXP1	GIGYF1	KATNAL2	KMT2E	RIMS1	TCF7L2	ASH1L	DOT1L	SPEN	AKAP9	DIP2C	GPRIN1	MBD5	MED13	NBEA	UBAP2L	UBR5	MYH10	SYNGAP1	TRIP12	AHDC1	CIC	CTNNB1	DST	KIAA0100	KIF21A	NF1	SPAG9
AutismKB	ACSL4	ADSL	AFF2	AGTR2	AHI1	ALDH5A1	ALDH7A1	ARHGEF6	ARID1B	ARX	ASMT	ATP13A4	ATRX	AUTS2	AVPR1A	BCL2	BDNF	BRAF	C4B	CACNA1C	CACNA1E	CACNA1F	CADM1	CASK	CDH10	CDH9	CDKL5	CEP290	CHD7	CHRNA4	CHRNB2	CNTNAP2	COMT	CREBBP	CYFIP1	DBH	DCX	DHCR7	DISC1	DMD	DMPK	DNAH5	DRD3	DRD4	EHMT1	EIF4E	EN2	FBXO33	FEZF1
[truncated: 1,722 more columns]

## Sheet: Cell-type-specific
Supplementary Table 8. List ASD-related/risk and cell-type-specific gene sets used for GSEA.
Neurons (Cahoy)	NA	NEUROD6	GLRA2	NOV	PRDM8	SLA	CRH	GABRG2	HTR2C	HS3ST2	MAL2	STMN2	GABRA5	NTS	GABRA1	SATB2	GPR88	SYT1	GDA	MYT1L	SLC17A6	NPAS4	CALB1	SLC12A5	EPHA7	VIP	MEF2C	SSTR2	PCSK2	SNAP25	SCG2	PGM2L1	PLCXD3	DLX1	VSNL1	SYT4	NRG3	SCN2A	ICAM5	KCNF1	CCK	VGF	TMEM130	CAMK4	ASPH	SLC6A7	ICA1L	MYO5B	NELL1
S1 Pyr Neurons (Zeisel)	NA	C9orf16	C2orf82	KIAA1107	ABI3BP	ADCYAP1	ADRB1	AGBL4	AKAP6	ANKRD13D	APOA1	ARG2	ARHGAP15	ARHGAP20	ARHGAP32	ARL4D	ARPP19	ARPP21	ASAP1	ATP1A1	ATP2A2	ATP2B2	ATP6V1D	B4GALT2	BSN	C2CD4C	KIAA1522	CABP1	CACNA1A	CACNA1I	CACNB3	CADM3	CALML3	CAMK2N1	CAMKK2	CA10	CCKBR	CDH18	CHRM4	CISH	CMPK2	CNTNAP5	COBL	COL5A1	COL6A1	CORO2A	CPA2	CPNE9	CRHR1
CA1 Pyr Neurons (Zeisel)	NA	FEM1A	ABHD17C	ABI1	ACOT4	ACTL6B	ACTR2	ACTR3	ADCK3	ADD2	ADRA1D	ADRA2C	AFF3	AGAP3	AGFG2	AHI1	ALOX12B	ALOXE3	AMZ1	ANO5	AP1S1	AP2B1	AP3B2	AR	ARF1	ARF5	ARHGAP39	ARHGEF28	ARHGEF9	ARL15	ARPC2	ARSJ	ASAP2	ASPHD2	B3GAT1	B4GALNT1	BAG4	BCR	BHLHE22	BRD9	BVES	C2CD2L	C2CD4A	CACNA1E	CACNG8	CADM2	CAMSAP3	CAMTA2	CASD1
GLU_Cortex Layer 1 (Kang)	SLC1A6	DGKD	ADAMTS5	UBASH3B	EPHB1	FSTL5	CBLN1	SHF	NDNF	LNX2	ERC1	PCDHB15	MAB21L1	NEUROD1	KIT	MMP24	SIAH3	POLB	MPP3	GLCE	DISP2	TP73	SEL1L3	TLE2	STK10	MMAA	GFOD2	NXPH4	DUSP4	GPRIN3	SH3BP5	FOXJ2	RNF122	RCAN3	PRDM10	TMEM159	GRIK2	CELF1	FBXO25	ABLIM3	NGFR	CNR1	DACT1	MAML3	NFIB	CRY1	CCNG2	NREP	FAM110B
GLU_Cortex Layer 2-4 (Kang)	TSHZ3	MEF2C	NOL4	NEUROD6	TBR1	RPRM	NAV3	ADRA2A	SATB2	EPHA5	MARK1	TIAM2	KCNA6	NELL2	SLIT1	CELF2	GNPTAB	WDR47	MYT1L	CAPN5	B3GALT2	NBEA	GPR22	CDK5R1	KCNH7	DOK5	KHDRBS3	MMP16	PTPRO	ST3GAL1	LRRTM2	FLRT2	LMO3	ATCAY	FAM49A	ENC1	NKAIN2	FOXG1	LRRTM4	CHL1	BCL11A	GPR21	ISLR2	GABRB3	HS3ST4	LHX6	PDE4D	SLA	SCN3A
GLU_Cortex Layer 4 (Kang)	MEF2C	SATB2	KHDRBS3	B3GALT2	SATB1	SORCS1	FAM81A	KCNV1	CNIH3	TBR1	LDB2	CDH13	TSHZ3	KALRN	LNX1	KHDRBS2	POU6F2	LMO7	RND1	OSBPL10	EPHB6	SYT16	PRICKLE2	SLITRK1	ATCAY	RAPGEF2	KCNQ3	FAM217B	FLRT2	DPP10	MLIP	ARHGAP32	PDE4D	CDKL5	LRRTM4	ENC1	EFNA5	SLIT1	MDGA2	TMEM241	PRDM2	FAM49A	KIAA1522	PPP2R2B	IL1RAPL2	GTDC1	HECW1	LINGO1	RAP2A
GLU_Cortex Layer 5 (Kang)	SOX5	FOXG1	EFNB2	NPR3	EML1	TBR1	SEMA3A	BCL11A	NEUROD6	SHISA2	EIF4EBP1	EMX1	SHB	PDGFC	FAT4	SCUBE1	RAI14	NFYA	MYO5B	PAPPA2	ALPK1	TIAM2	TTC28	STT3B	LZTS1	ISLR2	ARL4D	ST3GAL1	TAX1BP3	EPHA5	TSHZ3	ABRACL	SLA	NEUROD2	NEDD9	FAM126A	NEUROG2	LDB1	KIF26A	LRRC27	AFDN	PBX1	MYCN	CTTNBP2	ZNF277	NFIB	PELI1	TP53I11	IGSF9
GLU_Cortex Layer 6 (Kang)	FEZF2	NEUROD6	TSHZ3	ST3GAL1	EMX1	TIAM2	EFNB2	NEUROD2	SPIRE1	MYO5B	EML1	SEMA3A	SCUBE1	FOXG1	BCL11A	MARK1	AFF3	NPR3	ZBTB18	TMEM108	TCF4	NR4A2	ADRA2A	EIF4EBP1	TP53I11	TTC28	EPHA5	ZEB2	SLA	PRDM8	ARL4D	NELL2	SEMA3C	ISLR2	GTDC1	NOL4	GAREM1	MMP16	FAT4	PBX1	KHDRBS3	NBEA	DACT1	GRM2	RAP2A	DOK5	FRMD3	PAPPA2	DPP4
GLU_Subcortex (Kang)	NEFL	GRIK4	NEBL	PARM1	TMEFF2	FBXO27	GRIK1	SASH1	ABCA5	CHRM3	DMD	LGR4	PIK3R1	DTNA	SV2B	BIN1	PPP2R2C	PLEKHA6	NME5	SYNE1	DGKA	CRTAC1	PERP	ALCAM	SPARCL1	GABRB1	GABRB2	NALCN	PSMG1	PTPRE	TRAF5	PITPNM3	HNMT	GABRA1	LRRC4C	EDIL3	SPOCK2	PLEC	RAB27B	SRXN1	RAPGEFL1	GPRC5B	KCNIP4	SGCD	RASSF4	TPPP3	LGI1	PRKCB	CDK5R2
Interneurons (Zeisel)	NA	C11orf52	CHMP1B	KIAA1456	ACHE	ACOT7	ADAMTS17	ADAR	AFAP1	AGTPBP1	AKAP7	ALG2	ALK	ANK1	ANKRD34B	ANKRD55	ANKRD6	APBA1	ARAF	ARHGAP24	ARMCX2	ARMCX4	ARNT2	ARRB1	ARX	C12orf39	B4GALT5	BAIAP2L2	BAIAP3	C17orf53	BCAT1	BEAN1	BLCAP	BMP3	BTBD11	BTBD2	C1QL1	CACNG5	CALB2	CALCA	CAMK2D	CCNH	CDH7	CDS2	CELF6	CIB2	CIDEA	CILP2	CLNK
GABA_Pan GAD1,2 (Kang)	NRXN3	GABRA1	RCAN2	SLC32A1	ST8SIA3	KCNIP4	GPR158	PDE1B	RPH3A	DGKB	SLC6A1	SLC12A5	KCNA1	STEAP2	CYP46A1	SPOCK2	PCP4	CNNM1	ACSL6	REPS2	LAMP5	NIPAL2	AK5	GABRB2	ABLIM2	TSPYL2	TMEM38A	SIAE	GPR155	PLP1	SV2B	NPTN	NALCN	SPOCK3	ENTPD3	RGS4	MAP1A	SYNPR	CX3CL1	ENPP5	KCNH1	CHN1	NRIP3	RASD2	RASGEF1A	SYNJ1	SKAP2	SLC35F3	GOT1
GABA_Progenitor ASCL1 (Kang)	GAS2L3	SMC4	NUSAP1	CDCA7	TOP2A	CHEK1	IQGAP2	KIF22	CENPF	WEE1	MKI67	STIL	TPX2	WDR76	DTL	FBXW8	LOX	TP53	LRP5	CXCR4	CCNB2	BUB1	SOX1	KIF11	FANCG	POLA1	ZNF43	EPHA3	WDR34	KNL1	POLD1	TTK	CDC20	EFNB1	KIF20A	FBXO5	MSI1	TSPAN6	TRIP13	SKA3	FOXM1	CENPO	PBK	NXN	PRR11	POLE2	TEAD2	PLK1	HES6
GABA_Progenitor DLX1-2 (Kang)	DLX5	LHX6	FGD3	ARX	DLX6	BEND4	ASCL1	WNT7A	GAS2L3	MEIS2	PDZRN3	DRAXIN	MN1	ISLR2	SLC44A5	DCX	EPHA3	RND3	POU3F4	SP8	YPEL1	PLEKHG2	CDC42EP3	FOXG1	PROM1	TTC28	DPYSL3	ST8SIA2	VAV2	SOX11	IL17RD	N4BP2	SLCO5A1	CD24	CCDC14	ZNF711	FARP1	L3MBTL3	ZWILCH	AIM2	ANKRD50	ENOX1	FGD1	MEX3B	AFAP1	ATAT1	SETBP1	PARP16	CXXC4
GABA_Progenitor NKX2-1 (Kang)	LHX8	ISL1	SIX3	DLX6	NTN1	IKZF1	FZD5	RXRG	ZNF503	SLC5A7	SHH	PDYN	NTRK1	CAPN6	ARHGAP36	CASZ1	SYT10	DLX5	ONECUT2	EBF1	ECEL1	GPR6	DRD2	POU3F4	STRIP2	PBX3	MME	SDR42E1	AKNA	TMEM45A	CCDC107	ZFHX3	VAX1	SOX1	DLX1	LAMC2	SMOC2	DLX2	CCDC8	SOX6	MUC1	MAGEL2	E2F2	P2RY1	CRABP1	FAM222A	FHOD1	GPR1	FBXL21
GABA_PVALB (Kang)	RAB37	SCN1B	CPNE9	TTC39B	NEFH	GABRD	LPCAT1	SPTSSB	KCNA2	OGDHL	CPLX1	GNG13	PPIP5K1	FNDC5	ENPP5	USP45	AVPI1	KCNA1	RHBDL1	CADPS2	B4GALT6	KCNC1	ARHGAP9	FSTL4	YPEL4	GLS2	HAPLN4	EPDR1	NT5C1A	VAMP1	RNLS	GPR158	KCNK1	STEAP2	NAPA	CBX7	ZBTB7A	MRAP2	PRUNE2	GALNT9	TUBA8	NIPAL3	SCN2B	TUBA4A	GOT1	TOM1	NIPAL2	NRIP2	ALKBH6
GABA_CALB1 (Kang)	ST8SIA3	GABRA1	NRIP3	RCAN2	KCNIP4	SPOCK2	MGAT4A	SV2B	DNAJC12	CYGB	GAD2	PCP4	HTR5A	NRXN3	SIAE	GABRB2	GRIK4	NEBL	PDE1B	APLP2	NALCN	PPP2R2C	ENTPD3	GPR158	KCTD8	FGF14	RIMS1	CYP46A1	KCNAB1	PTPRR	NDRG4	TAPBP	EPB41L4B	SLC7A14	TSPAN7	RPH3A	PLD5	TUBA8	GPR155	ME1	NOS1	DGKA	SLC12A5	KCNA1	GRIK1	ADAM22	SGPP2	SCG2	SYNPR
GABA_CALB2 (Kang)	KCND2	ZCCHC12	NXPH1	RGS8	DNER	PITPNM1	CAMK2D	NTNG1	CSDC2	TENM1	RAB3B	PROX1	ACHE	NRXN2	GALNT14	SLC24A3	CELF4	CALY	RIT2	VAT1L	SYNPR	TMEM163	CHRNA6	RGS16	KCNK3	TINCR	CPNE7	CA10	VWC2	SLC17A6	MAPK8IP1	CYB561	SCN7A	PTPN3	KCNC4	MAP1LC3A	GAP43	GRM1	PCBD1	CHPF	HTR7	CHGB	SEZ6L2	PPM1J	NTS	SLC4A3	PPP2R5B	SYT9	ADCY8
GABA_CCK (Kang)	GDA	RASGRF2	CREG2	EXTL1	VIP	RXFP1	AGBL4	RGS4	HTR2A	CAMK2A	SYTL2	SLC30A3	GCNT4	MATK	GRIN2A	KCNC2	NRGN	MFSD4A	ICAM5	CHN1	CRHBP	EPHX4	KCNH3	KIAA1211L	DCAF6	AK5	DUSP3	RASAL1	KIF5A	SGTB	DMTN	CXCL14	GABRA4	YWHAH	ARHGDIG	LYRM9	LRMP	RPH3A	STX1A	ADCY2	GLRA3	HLF	COBL	HPRT1	DLGAP2	KCNAB2	MBP	TOLLIP	PACSIN1
GABA_NOS1 (Kang)	KCNAB1	LAMP5	ST8SIA3	GPR83	SLC32A1	GPR155	PDE1B	RIN1	GAD2	CALB1	CYGB	GPR158	KCNA1	SPOCK3	PCP4	SPOCK2	SPARCL1	SOWAHA	GRIK4	KSR2	RASGEF1A	MAP3K5	NRXN3	STRIP2	PRKCG	SCN4B	SYTL5	MINK1	SLC35F3	NPTN	TSPYL2	KCNIP2	PHYHIP	NALCN	SLC12A5	WSCD2	ALDH5A1	DGKB	REPS2	MAP7	TSPAN7	PTPRE	TESC	SIK3	RAP1GAP	SGPP2	SLC6A1	HEPACAM	RAB40B
GABA_VIP (Kang)	GDA	CCK	SLC30A3	RASGRF2	NRGN	ICAM5	KCNH3	CREG2	MATK	RGS4	RXFP1	GRIN2A	STX1A	MFSD4A	EXTL1	SYTL2	CXCL14	CRHBP	CAMK2A	GCNT4	PITPNM2	FAM131A	KIAA1211L	LYRM9	EGR3	CAMK1	AGBL4	RASAL1	DLGAP2	CTSB	CHN1	SERTM1	CX3CL1	CHRM3	CABP1	DCAF6	DUSP3	TRHDE	RAPGEF4	HTR2A	SPARCL1	SGTB	PACSIN1	ARHGAP10	RAPGEFL1	CMTM4	MICAL2	TMEM38A	ADCY2
Oligodendrocytes (Cahoy)	NA	MOG	MOBP	ENPP6	CLDN11	MAG	PLEKHH1	FA2H	SGK2	IL23A	MBP	GPR62	TSPAN2	MAL	ERBB3	ADAMTS4	ELOVL7	PPP1R14A	PLP1	PLXNB3	GAL3ST1	BCAS1	SRPK3	CPM		PLA2G4A	GSN	PRKCQ	SEMA3D	GALNT6	PDLIM2	RFFL	GPR17	HAPLN2	GJB1	SFT2D1	LGI3	NKX6-2	SOX10	ADSSL1	GJE1	SLC45A3	ANLN	TNNI1	PLLP	CYP27A1	KNDC1	DOCK10	C1orf106
Oligodendrocytes (Zeisel)	NA	C14orf1	C17orf98	C4orf3	C20orf194	KIAA0930	C9orf91	C1orf116	AAMDC	AATK	ABCA2	ABL1	ABTB2	ACAT2	ADH5	ADI1	ADO	ADSSL1	AGPAT4	ALDH9A1	ANGPT4	ANKRD13A	ANKRD28	ANLN	ANO10	ANO4	AP3M1	AP5Z1	APLP1	APOD	ARFGAP3	ARHGAP23	ARHGEF10	ARL2	ARRDC3	ARSG	ASAH2C	ASPA	ATAT1	ATP10B	ATP11A	ATP1B3	B3GALT5	B3GNT9	BCAP31	BET1	BFSP2	BPGM	BTBD16
Oligodendrocytes Progenitor (Kang)	GPR17	NT5E	HEPACAM	RAB31	AQP4	CST3	MMD2	SCRG1	BCAN	ITM2C	CXCL14	SOX10	PLA2G5	APOE	SLC25A18	SLC15A2	GPC5	EPAS1	ITPR2	ZCCHC24	CD9	CD38	SLCO1C1	RAPGEF4	GPR37L1	AGT	ARHGEF6	ACSBG1	ZBTB47	S100A16	RGCC	DAAM2	NDRG2	CPT1A	FGF1	SLC7A10	ATP13A4	SLC1A2	MLC1	GRAMD2B	HTRA1	F3	SFXN5	ST6GALNAC6	CX3CL1	CYP46A1	EPB41L2	SASH1	MT3
Oligodendrocytes Mature (Kang)	MAG	MOG	PLLP	TF	UGT8	MAL	DBNDD2	ERBB3	ENPP2	CMTM5	TMEM144	ASPA	OPALIN	TMEM63A	MYRF	PADI2	ELOVL1	RTKN	CARNS1	CPM	SLCO1A2	KLK6	EVI2A	FA2H	CLDN11	TTYH2	P2RX7	FAM102A	NINJ2	CDK18	HSPA2	GLDN	ADAMTS4	CSRP1	HDAC11	LGI3	MBP	DAAM2	SH3TC2	GJB1	PLEKHB1	PRR18	LAMP2	GSN	C10orf90	SEMA4D	NKX6-2	PLXNB3	AMPD3
Astrocytes (Cahoy)	NA	GFAP	AQP4	PLA2G7	SLC39A12	MLC1	DIO2	SLC14A1	ALDH1L1	ALDOC	TTPA	ACSBG1	CHRDL1	SLC4A4	SLC1A2	SLC25A18	SLC1A3	F3	PPP1R3G	FZD2	MERTK	GJB6	HAPLN1	RFX4	PAPSS2	SLC15A2	PPP1R3C	TLR3	ACOT11	ATP1A2	BMPR1B	PRODH	GLI3	TMEM47	SLC9A3R1	CTH	NTSR2	SLC7A10	VCAM1	FGFR3	CCDC80	ENTPD2	CYBRD1	KCNE1L	FAM20A	TNC	TLCD1	CBS	PBXIP1
Astrocytes (Zeisel)	NA	AASS	ABCB9	ACADVL	ACOT11	ACSBG1	ACSL3	ACSL6	ACSS1	ACSS2	ADCY2	ADD3	ADK	AGL	AGPAT3	AGPAT5	AHCYL1	AIFM2	AK3	AKT2	ALDH7A1	ALDOC	ALPK1	AMER2	AMPD3	AMT	ARHGEF10L	ASPG	ATL2	ATOH8	BAALC	BMP7	BMPR1A	BMPR1B	CAPN2	CA5B	CA8	CBR3	CECR2	CHRDL1	CHST11	CHST2	CKB	CLDN10	CLYBL	CMBL	NAT8	CMYA5	CNTFR
Astrocytes (Kang)	FGF1	NDRG2	CST3	AGT	MBP	FDXACB1	PLEKHB1	AQP4	MAP3K5	MT3	GPR37L1	DTNA	HEPACAM	GRAMD2B	CNTNAP1	BHLHE41	SPARCL1	FXYD1	BCAS1	CEND1	SIRPA	PLP1	DAAM2	RAPGEF4	CSRP1	SLC25A18	TF	TUBA4A	HSPB8	APOD	APOE	SCRG1	P2RX7	PAQR8	ADHFE1	NALCN	SGPP2	ATP1A2	MAP7	SPOCK2	ARHGAP26	RASSF4	TMBIM1	CLU	PACSIN1	CD9	ACSL6	DGKG	PAQR6
Microglia (Albright)	NA	IL1B	TIMP1	F13A1	CASP9	IGFBP3	IGF1	IGFBP5	HBEGF	S100A9	NR4A3	CXCL6	RAMP1	FN1	PLAUR	MMP12	STAB1	IL8	CCL22	ALOX5AP	AKAP10	CAMK1	RGS2	TGM2	LAMP3	CALR	TNC	DUSP1	SLC11A1	CCL2	ARID5A	HK3		COX6B1	CLDN9	RUNX3	CTGF	AGPAT1	THBD	LAMB1		SNAPC2	PFDN1	GAP43	PIM1	INSL3	CCL20	ARID5B	GK
Microglia (Kang)	C7	TGFBR3	LAMA2	MYOF	IFITM1	F13A1	C1S	TGFBR2	PTGDS	SLC6A13	CYP1B1	DCN	GIMAP4	CEBPD	ACTA2	ISLR	OSMR	C1R	CYBB	TGM2	GJA1	LY96	TNFRSF1A	OMD	CSF1	SLC7A2	EHD2	SLC7A11	MYL9	RNF144B	CLDN11	LTBR	FMOD	OGN	IL1R1	COPZ2	CTSK	CYBRD1	LYVE1	ANXA4	TM4SF1	LGALS1	VAMP5	KANK2	HLA-E	KIAA0040	CD14	TMBIM1	SERPINB1
[truncated: 1,912 more columns]

## Sheet: Cell-type-specific (Velmeshev)
Supplementary Table 8. List ASD-related/risk and cell-type-specific gene sets used for GSEA.
Layer 2/3	HS6ST3	KCNIP4	LRRTM4	FAM19A1	CUX2	IQCJ-SCHIP1	AC011288.2	R3HDM1	CBLN2	CTC-552D5.1	GRIA4	DGKB	LINC01378	PVRL3	EPHA6	TESPA1	CSMD1	LDB2	CA10	MLIP	ENC1	LINC01250	AC007563.5	RP11-30J20.1	RFX3	SATB2	NDST3	CHRM3	KCTD16	SLIT3	RGS6	EPHA4	LINGO2	PTPRK	ARPP21	CDH18	ERICH1-AS1	EPB41L2	CDH12	KIRREL3	FAM19A2	GALNTL6	RALYL	ANO3	CDH13	GPC6	PDZD2
Layer 4	POU6F2	FOXP2	PTPRD	IL1RAPL2	RORB	RALYL	CTC-340A15.2	TSHZ2	KCNIP4	FSTL4	CPNE4	HS3ST2	CTC-535M15.2	KCNQ5	IQCJ-SCHIP1	RYR2	SYT1	CADPS2	NKAIN2	SLC22A10	RXFP1	KHDRBS3	NRG1	HS3ST4	PHACTR1	NELL2	CNTN5	SATB2	LDB2	ARPP21	KHDRBS2	SV2B	PDE1A	OLFM3	KCNH1	EFNA5	NREP	MLIP	ZNF385B	FOXP1	FAM19A2	DCC	TOX	PDZRN4	ZMAT4	UNC5D	GRM7	LY86-AS1	DPP10
Layer 5/6	TLE4	ASIC2	KIAA1217	MDGA2	LRP1B	SEMA3E	HS3ST4	EGFEM1P	DLC1	DPP10	FOXP2	PDZRN4	SLC8A1	OLFM3	PTPRD	RYR2	CLSTN2	KIAA1456	ARPP21	TRPM3	NKAIN2	RP11-586K2.1	GRIK3	PCDH11Y	RALYL	DIRAS2	LUZP2	CDH11	ZFPM2	SLC35F1	PCDH11X	ROBO2	MLLT4	GABRG3	SV2B	EPHA5	RXFP1	FRAS1	LINC01122	ZNF385B	PDE1A	MIR137HG	MCTP1	C8orf34	RYR3	ZNF385D	NRG1
Layer 5/6 Cortico-cortical projection	NRG1	PDZRN4	RALYL	LRP1B	SYT1	RXFP1	CLSTN2	KCNIP4	ZNF804B	POU6F2	AC114765.1	CTNNA2	NELL1	SATB2	DPP10	SOX5	RP11-586K2.1	RIT2	CBLN2	PTPRK	CDH12	SLC35F3	CADPS2	SLIT3	IL1RAPL2
NRGN-expressing neurons-I	TMSB10	PKM	SYT1	HSP90AA1	HSP90AB1	SYP	STMN2	RAB3A	TMEM59L	GAPDH	RTN4	STMN1	TUBA1B	YWHAH	CHN1	ARPP19	OLFM1	MAP1B	SNAP25	BEX1	RTN3	SARAF	TUBB2A	RTN1	ATP1B1	ALDOA	THY1	NRGN	UCHL1	CALM3	VSNL1	NGFRAP1	YWHAG	CLSTN1	ENC1	PRNP	SEPW1	CALM1	NEFL	TSPAN7	SCG5	SNCA	ATP1A1	EIF4A2	PCSK1N	ENO2	SLC17A7	CKB	SERINC1
NRGN-expressing neurons-II	SYT1	SYP	RTN4	YWHAH	CHN1	ARPP19	MAP1B	SNAP25	BEX1	RTN3	RTN1	THY1	CALM3	ENC1	CALM1	HSP90AB1	TUBA1B	ATP1B1	CLSTN1	STMN1	TMEM59L	VSNL1	NRGN	UCHL1	OLFM1	ALDOA	NGFRAP1	STMN2	HSP90AA1	TUBB2A	GAPDH	ATP1A1	PKM	SARAF	TSPAN7	ATP2B1	SERPINI1	CCK	PLD3	PRNP	STXBP1	SERINC1	SCG5	FAIM2	TMSB10	EIF4A2	RAB3A	SEPW1	YWHAG
Maturing neurons	KCNIP4	MEG3	AC011288.2	IQCJ-SCHIP1	RALYL	PHACTR1	RBFOX1	KCNQ5	CSMD1	CELF2	AGBL4	CCSER1	STXBP5L	LRRTM4	LINGO2	LDB2	R3HDM1	ROBO2	DGKB	FAM19A1	KALRN	DLGAP1	HS6ST3	ASIC2	KHDRBS2	PTPRD	CHRM3	ERICH1-AS1	SNHG14	ARPP21	ADGRL2	NRG3	TENM2	RGS7	SYT1	CBLN2	SLIT3	CNTNAP2	EPHA6	ERC2	CACNA1B	GRIA4	NRXN3	RYR2	CDH18	DCLK1	GALNTL6	PDE4D	FSTL4
Parvalbumin interneurons	TAC1	ANK1	MYO16	CNTNAP3	SOX6	FGF12	NXPH1	GAD1	SLIT2	BTBD11	ZNF385D	GRIP1	KCNC2	KCNAB1	ZNF804A	DLGAP1	CNTNAP2	DPP10	ERBB4	TMEM132C	VWC2	ZNF536	RP11-123O10.4	SNHG14	PTCHD4	KIAA1217	GAD2	PTPRM	CNTNAP3B	NHS	AC010127.3	TENM1	SPOCK3	SNRPN	SDK1	ALK	PLCXD3	PAM	TRPC4	SLC6A1	DLX6-AS1	SAMD5	RP11-444D3.1	RBMS3	ADAMTS17	SLC9A9	FAM19A2	KLHL5	KLF12
Somatostatin interneurons	NRXN3	RBFOX1	SOX6	KIAA1217	NXPH1	GRIP1	SST	SYNPR	GRIK2	ROBO1	GRIK1	CNTNAP2	ROBO2	COL25A1	SPOCK3	GRIN3A	XKR4	SNHG14	RP11-123O10.4	CDH9	SHISA6	DLGAP1	WLS	GAD1	ELAVL2	PLCH1	KIF26B	GRIK3	RUNX1T1	TIAM1	STXBP6	GRID2	ZNF385D	BACH1	RAB3B	TENM3	PCDH11X	RBMS3	PTPRM	OXR1	TENM1	MAF	SNRPN	LHFPL3	PCDH15	SLC24A3	SATB1-AS1	TENM2	PCLO
VIP interneurons	PROX1	VIP	RGS12	SYNPR	CNTNAP2	GALNTL6	ERBB4	PLD5	ADARB2	SNHG14	DLX6-AS1	NR2F2-AS1	CXCL14	THSD7A	GAD1	ZNF536	CALB2	CNR1	SLC24A3	INPP4B	GRIK2	ARL4C	NRXN3	ROBO1	ROBO2	ZNF385D	IGF1	BTBD11	MIR325HG	EGFR	RP11-123O10.4	PDE3A	SCG2	AP1S2	PWRN1	NHS	C8orf34	SDK1	KCNT2	KIAA1211	DAB1	CNTN5	VWC2L	GRIP1	L3MBTL4	VWC2	ZNF804A	THSD7B	SNRPN
SV2C interneurons	MYO16	FGF14	KIAA1211	EYA4	SV2C	NXPH1	BCL11B	GAD1	FGF13	GAD2	TRPC3	NXPH2	RBMS3	EGFR	GRIP1	SLC6A1	KIT	FREM1	KCNC2	FSTL5	KCNAB1	ALK	GRIK1	PTPRM	ERBB4	MGAT4C	GRIN2A	FBXL7	SGCZ	ADARB2	PRELID2	DNER	KAZN	PTPRT	ZNF536	GRIN3A	DLX6-AS1	SOX2-OT	PTCHD4	RP11-123O10.4	LAMP5	TOX2	GRIA4	MTUS2	UNC13C	NFIB	PKP2	UBASH3B	CNTNAP4
Protoplasmic astrocytes	ATP1A2	PREX2	CTNNA2	RORA	SLC1A3	LRRC16A	SLC4A4	COL5A3	GLIS3	SLC1A2	PARD3B	MACF1	DTNA	NHSL1	GLUL	BMPR1B	SLCO1C1	SFXN5	GPM6A	NPAS3	GJA1	MSI2	PITPNC1	TNIK	ADGRV1	CACNB2	CTNND2	AQP4	HPSE2	GPC5	NRXN1	NTM	CADM1	PRKG1	LSAMP	NKAIN3	ZNF98	RYR3	MIR99AHG	RNF219-AS1	RP11-384F7.2	NEAT1	FBXL7	SLC7A11	RANBP3L	ARHGAP24	GABRB1	ZBTB20	C1orf61
Fibrous astrocytes	ADGRV1	GPC5	CTNNA2	SLC1A3	DTNA	LSAMP	RNF219-AS1	GPM6A	PITPNC1	NRG3	NTM	NPAS3	MACF1	SLC4A4	MSI2	DPP10	RORA	SORBS1	DCLK2	CTNND2	COL5A3	PRKG1	FMN2	CLU	RYR3	PTGDS	SFXN5	TNIK	MIR99AHG	APOE	C1orf61	NCAN	GFAP	NRXN1	NDRG2	MMD2	FGFR3	ABLIM1	AHCYL2	GLIS3	GABRB1	PRODH	NEBL	CST3	ARHGEF4	LRRC16A	AQP4	NKAIN3	DST
Microglia	NAV3	MEF2A	ST6GAL1	APBB1IP	MEF2C	FYB	DOCK8	PLXDC2	ITPR2	DOCK4	ARHGAP24	C10orf11	FRMD4A	P2RY12	HS3ST4	KCNQ3	SRGAP2B	SFMBT2	SRGAP2	SORL1	ADAM28	C3	MAML3	DIAPH2	LDLRAD4	CYFIP1	RUNX1	SRGAP2C	SYNDIG1	SLC9A9	TBXAS1	AOAH	ATP8B4	RASGEF1C	INPP5D	RP11-624C23.1	AKAP13	LPAR6	EPB41L2	ANKRD44	ABR	ARHGAP22	CSF1R	CSF2RA	ST6GALNAC3	ARHGAP26	PTPRJ	SLCO2B1	MBNL1
Oligodendrocytes	CLDN11	SLC44A1	PHLPP1	TF	QKI	MAN2A1	FRMD4B	PLCL1	PLP1	MAP7	DOCK10	ENPP2	TTLL7	ST18	PIP4K2A	ELMO1	SLC24A2	PPP2R2B	FMNL2	SIK3	TMEM144	EDIL3	MOBP	IL1RAPL1	FRMD5	TMTC2	UNC5C	CTNNA3	PCDH9	PDE4B	RNF220	SHTN1	MAGI2	NKAIN2	DPYD	MBP	CNP	SH3GL3	ANK3	DOCK5	DLG1	FRYL	TMEM165	SCD	PRUNE2	PDE8A	MYO1D	CREB5	UGT8
Oligodendrocyte precursor cells	VCAN	EPN2	XYLT1	PTPRZ1	SOX6	SEMA5A	TNR	NXPH1	DPP6	NOVA1	MDGA2	SNTG1	LRRC4C	PCDH15	GRID2	CA10	MMP16	AGAP1	BRINP3	LRP1B	NLGN1	CHST11	DSCAM	LRRTM4	CSMD1	OPCML	MAML2	KCND2	KCNIP4	DCC	LUZP2	LHFPL3	KAZN	SLC35F1	RP4-668E10.4	CSMD3	SOX2-OT	LINC00511	NRXN1	PID1	GRIK1	KIF13A	FGF14	SEZ6L	CASK	ZEB1	BCAN	ADARB2	FGF12
Endothelial cells	PRKCH	SYNE2	ITM2A	COBLL1	MECOM	ABCB1	FLT1	SLC7A5	FN1	EPAS1	ABCG2	ITIH5	GPCPD1	ID1	PODXL	ARHGAP29	LEF1	IFITM3	RGS5	RBMS3	PTPRG	UTRN	IGFBP7	EBF1	DLC1	IFI27	B2M	A2M	CLDN5	HLA-E	ATP10A	ITGA1	ESYT2	NEAT1	ADGRF5	LHFP	CGNL1	NDUFA4L2	THSD4	BSG	ST8SIA6	ENG	FLI1	ID3	ADGRL4	SLC38A5	VWF	SLC2A1	SLC7A1
[truncated: 294 more columns]
